# Supplementary material
Source: Research Square preprint supplement (doi:10.21203/rs.3.rs-9380272/v1)
Supplement: Supplementary file 1 [file 5215fbc657401d6b8f9ce9eb.docx]

*Supporting Information for*

**Structural reorganization of mesoscale eddies amplifies global air-sea heat exchange**

**Contents of this file**

**1. SI Texts**

**Text S1. XGBoost Model Optimization**

The XGBoost model was optimized by systematically tuning key hyperparameters using a trial-and-error approach. The hyperparameters examined included the boosting learning rate (learning_rate), number of trees (n_estimators), maximum tree depth (max_depth), subsample ratio (subsample), and regularization parameters (reg_alpha and reg_lambda), as well as the optimization objective. Based on this optimization procedure, the final model configuration was selected with a learning rate of 0.1, 900 trees, a maximum tree depth of 10, a subsample ratio of 0.8, L1 and L2 regularization parameters of 0.0 and 1.0, respectively, and a squared-error regression objective (reg:squarederror).

**2. SI Figs**


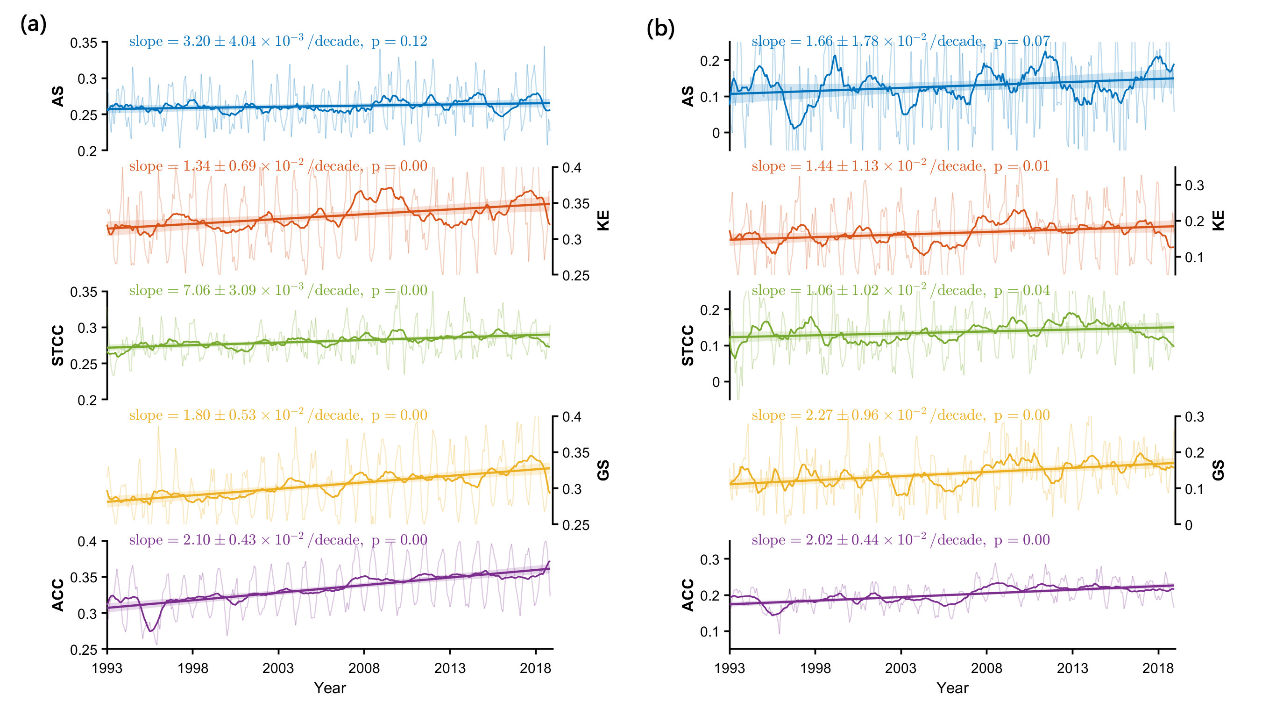


Fig S1. (a) Regional time series of for selected oceanic regions. Including the Arabian Sea (AS), Kuroshio Extension (KE), Subtropical Countercurrent region (STCC), Gulf Stream (GS) and Antarctic Circumpolar Current (ACC). Thin lines represent the 3-month averaged, thick lines denote the annual average variations, and solid straight lines indicate linear trends with corresponding slopes and p-values. The shadow around the trend lines represents the 95% confidence intervals of the linear regression. (b) Same as (a), but for the air-sea heat flux net efficiency.


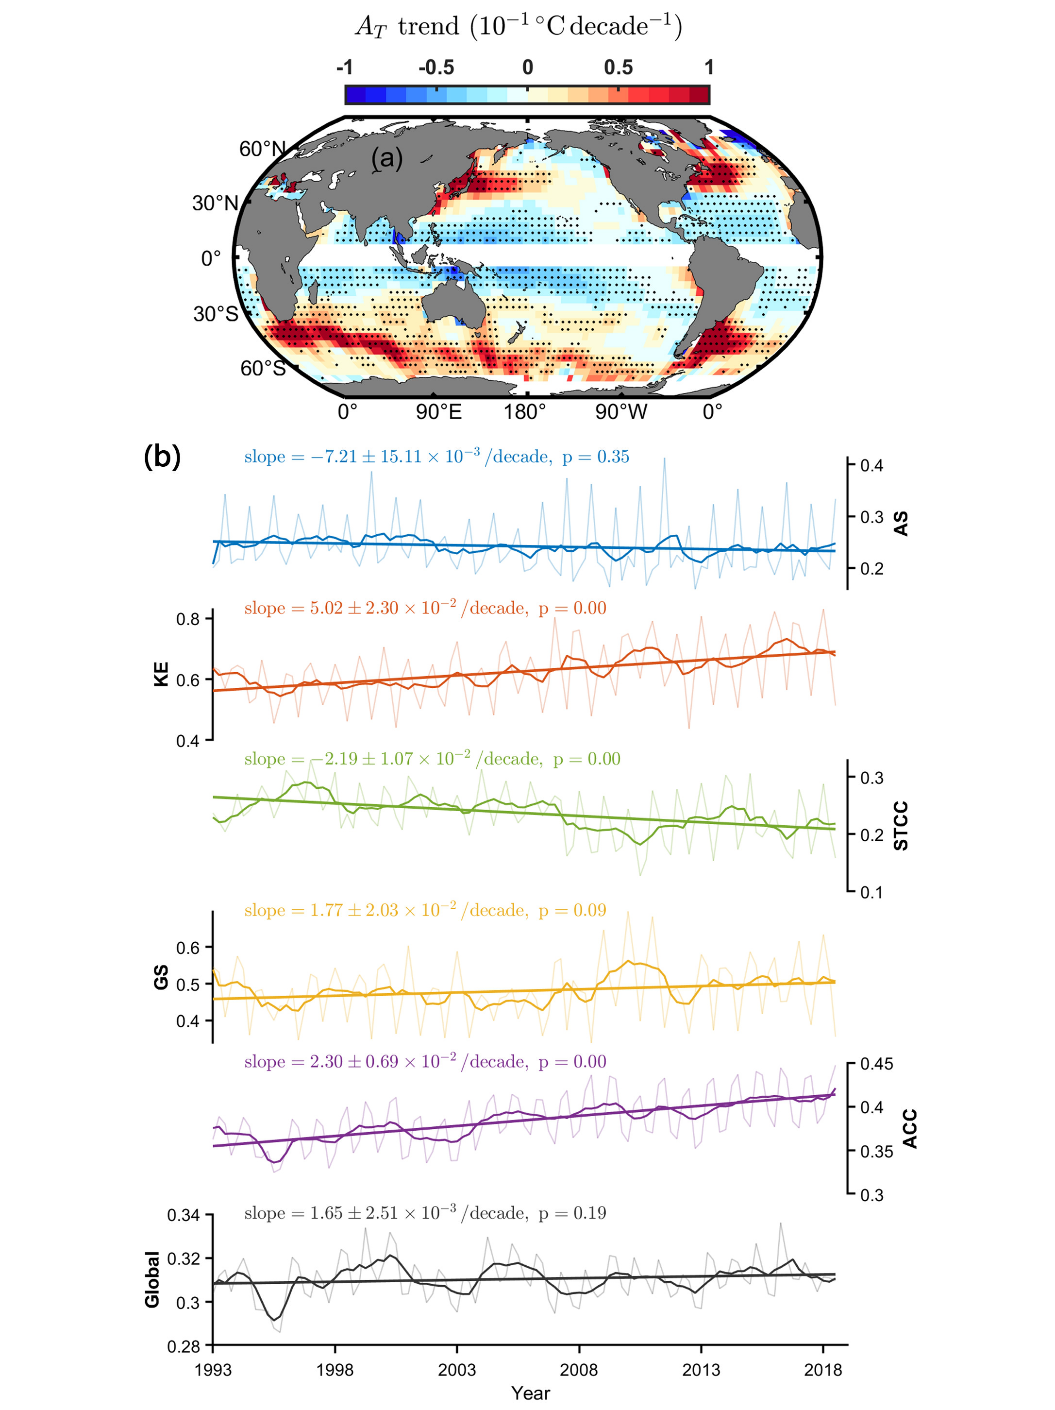


Fig S2. The global distribution of linear trends in the eddy-induced SSTA amplitude () within each grid box from 1993 to 2018. Color denotes the trend magnitude (), and black dots indicate grid point where the trend is statistically significant at the 95% confidence level. (b) Regional time series of for selected oceanic regions. Including the Arabian Sea (AS), Kuroshio Extension (KE), Subtropical Countercurrent region (STCC), Gulf Stream (GS), Antarctic Circumpolar Current (ACC), and the global mean. Thin lines represent the 3-month averaged, thick lines denote the annual average variations, and solid straight lines indicate linear trends with corresponding slopes and *p*-values.





Fig S3. Idealized finite-size Lyapunov exponent (FSLE) fields for (a) a monopole SSTA pattern and (b) a dipole SSTA pattern. (c) Absolute FSLE difference between the eddy edge and core as a function of α, separately for cyclones (blue) and anticyclones (red). Bars denote the mean value in each α bin, and error bars indicate the corresponding 95% confidence intervals.


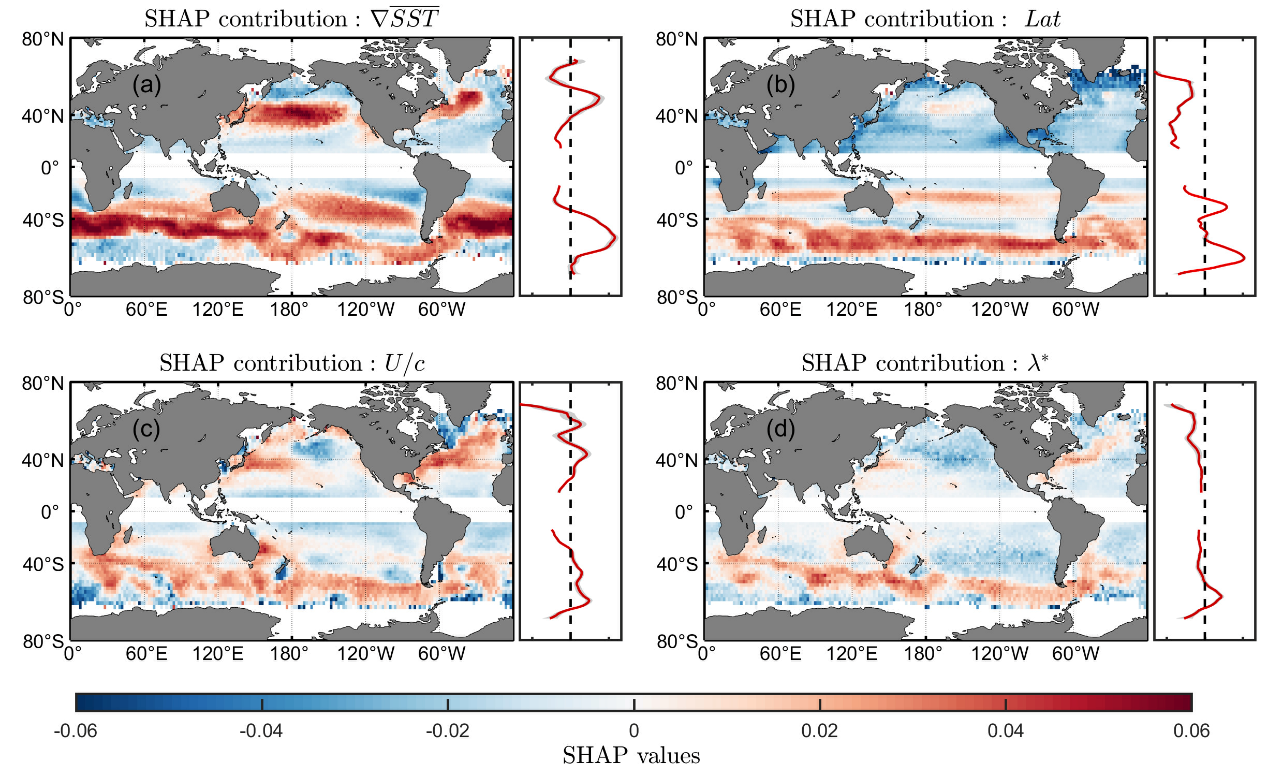


Fig S4. Spatial distribution of SHAP values for the four most important predictors, averaged into grid boxes. (a) Background sea surface temperature gradient (). (b) Latitude. (c) The eddy nonlinearity parameter (). (d) The normalized air-sea damping rate (). For each panel, the right-hand curve shows the zonal-mean SHAP contribution as a function of latitude, with gray shading indicating the standard errors.


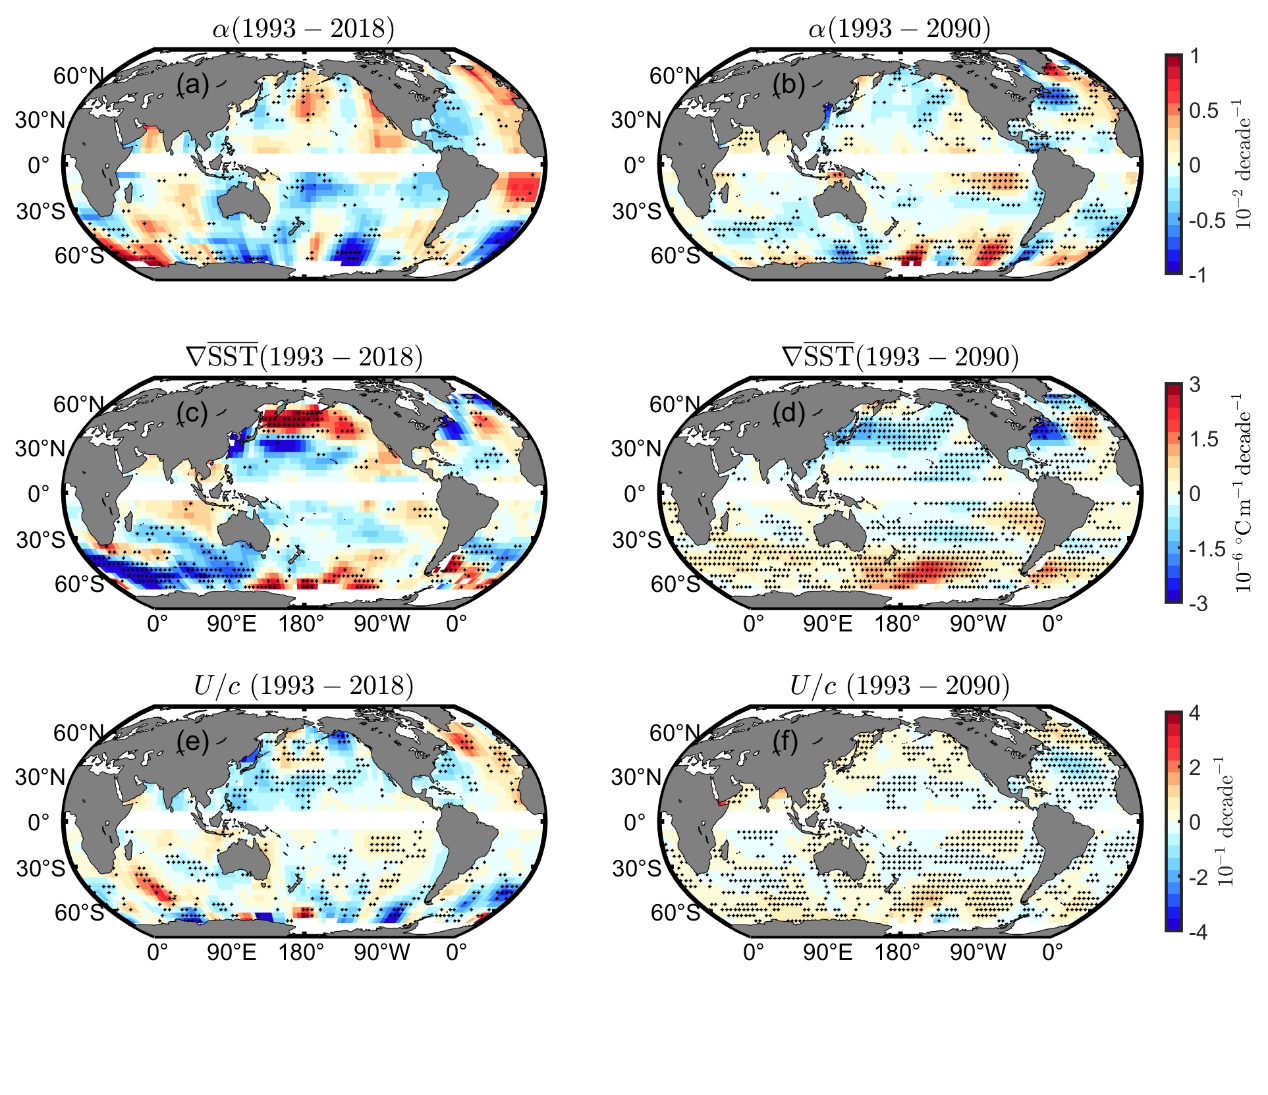


Fig S5. The temporal trends of various variables extracted from CESM climate data under the high-emission and 0.1°resolution scenario are shown. Eddy-related information was obtained using the eddy detection method provided by Dong et al. (2022). (a) and (b) show the surface temperature anomaly (SSTA) structure index for the mesoscale eddies, while (c) and (d) display the large-scale background SST gradient (). (e) and (f) represent the eddy nonlinearity parameter (). The left column (a, c, e) corresponds to results calculated using the 1993-2018 dataset, which can be compared with satellite observations. The right column (b, d, f) represents the results from 1993-2090. It is evident that there is a significant difference between the CESM results and satellite observations for the same time period, and the CESM simulations do not show a trend towards monopole-like shifts in eddy-induced SSTAs in future projections. Furthermore, the two primary factors influencing the SSTA index, namely and , do not exhibit patterns similar to those observed in satellite data.
